# Supplementary material for: Network-assisted analysis of GWAS data identifies a functionally-relevant gene module for childhood-onset asthma
Source: PubMed Central journal article supplement (PMC5430538; doi:10.1038/s41598-017-01058-y), 2017-04-20
Supplement: 41598_2017_1058_MOESM1_ESM.pdf [file 41598_2017_1058_MOESM1_ESM.pdf]

# SUPPLEMENTARY INFORMATION

## **Network-assisted analysis of GWAS data identifies a functionally-relevant gene module for childhood-onset asthma**

Y. Liu<sup>1,2\*+</sup>, M. Brossard<sup>1,2+</sup>, C. Sarnowski<sup>1,2</sup>, A. Vaysse<sup>1,2</sup>, M. Moffatt<sup>3</sup>, P. Margaritte-Jeannin<sup>1,2</sup>, F. Llinares-López<sup>4</sup>, M.H. Dizier<sup>1,2</sup>, M. Lathrop<sup>5</sup>, W. Cookson<sup>3</sup>, E. Bouzigon<sup>1,2</sup>, F. Demenais<sup>1,2\*</sup>

<sup>+</sup>These two authors contributed equally to the work

<sup>1</sup>INSERM, Genetic Variation and Human Diseases Unit, UMR-946, Paris, France

<sup>2</sup>Université Paris Diderot, Université Sorbonne Paris Cité, Institut Universitaire d'Hématologie, Paris, France

<sup>3</sup>Genomic Medicine Section, National Heart Lung Institute, Imperial College London, London, UK

<sup>4</sup>Machine Learning and Computational Biology Lab, Department of Biosystems Science and Engineering, ETH Zürich, Basel, Switzerland

<sup>5</sup>McGill University and Genome Québec Innovation Centre, Montréal, Québec, Canada.

Correspondence should be addressed to Y. Liu (email: [yuanlong.liu@inserm.fr](mailto:yuanlong.liu@inserm.fr)) or F. Demenais (email: [florence.demenais@inserm.fr](mailto:florence.demenais@inserm.fr))

## Table of content

|                                                                                                                                                                            |    |
|----------------------------------------------------------------------------------------------------------------------------------------------------------------------------|----|
| <b>Supplementary Figure S1.</b> Double Manhattan plot of gene-level $P$ -values in META1 and META2....                                                                     | 1  |
| <b>Supplementary Figure S2.</b> Distribution of pairwise module similarities before and after merging the raw modules generated by the Dense Module Search algorithm. .... | 2  |
| <b>Supplementary Figure S3.</b> Distribution of pairwise module similarities between modules in META1 and modules in META2.....                                            | 3  |
| <b>Supplementary Figure S4.</b> Consistent gene modules between META1 and META2.....                                                                                       | 4  |
| <b>Supplementary Figure S5.</b> An illustrative example of fastCGP. ....                                                                                                   | 5  |
| <b>Supplementary Figure S6.</b> Comparison of gene-level $P$ -values obtained by fastCGP and VEGAS2 ...                                                                    | 6  |
| <b>Supplementary Figure S7.</b> Comparison of gene-level $P$ -values obtained by fastCGP and MAGMA ..                                                                      | 7  |
| <b>Supplementary Table S1.</b> Gene-level $P$ -values in META1 and META2 datasets for the 91 genes in the final childhood-onset asthma module .....                        | 8  |
| <b>Supplementary Methods 1:</b> computing gene-level $P$ -values via fastCGP. ....                                                                                         | 11 |
| <b>Supplementary Methods 2:</b> generating random modules via Metropolis-Hasting Random Walk algorithm. ....                                                               | 13 |
| <b>References</b> .....                                                                                                                                                    | 13 |

**Supplementary Figure S1. Double Manhattan plot of gene-level  $P$ -values in META1 and META2.** Gene-level  $P$ -values were computed from SNP-level  $P$ -values using fastCGP. META1 and META2 correspond to the results of meta-analysis of 9 COA GWAS each. The GWAS are part of the GABRIEL asthma consortium (ALSPAC, BAMSE, ECRHS, MAS/MAGICS, SLSJ, TOMSK, UFA, CAPPS studies for META1; B58C, BUSSELTON, EGEA, GABRIEL Advanced Surveys, KSMU, MRCA-UKC, PIAMA, SAPALDIA, SAGE studies for META2; see Moffatt et al<sup>1</sup> for details on these studies)

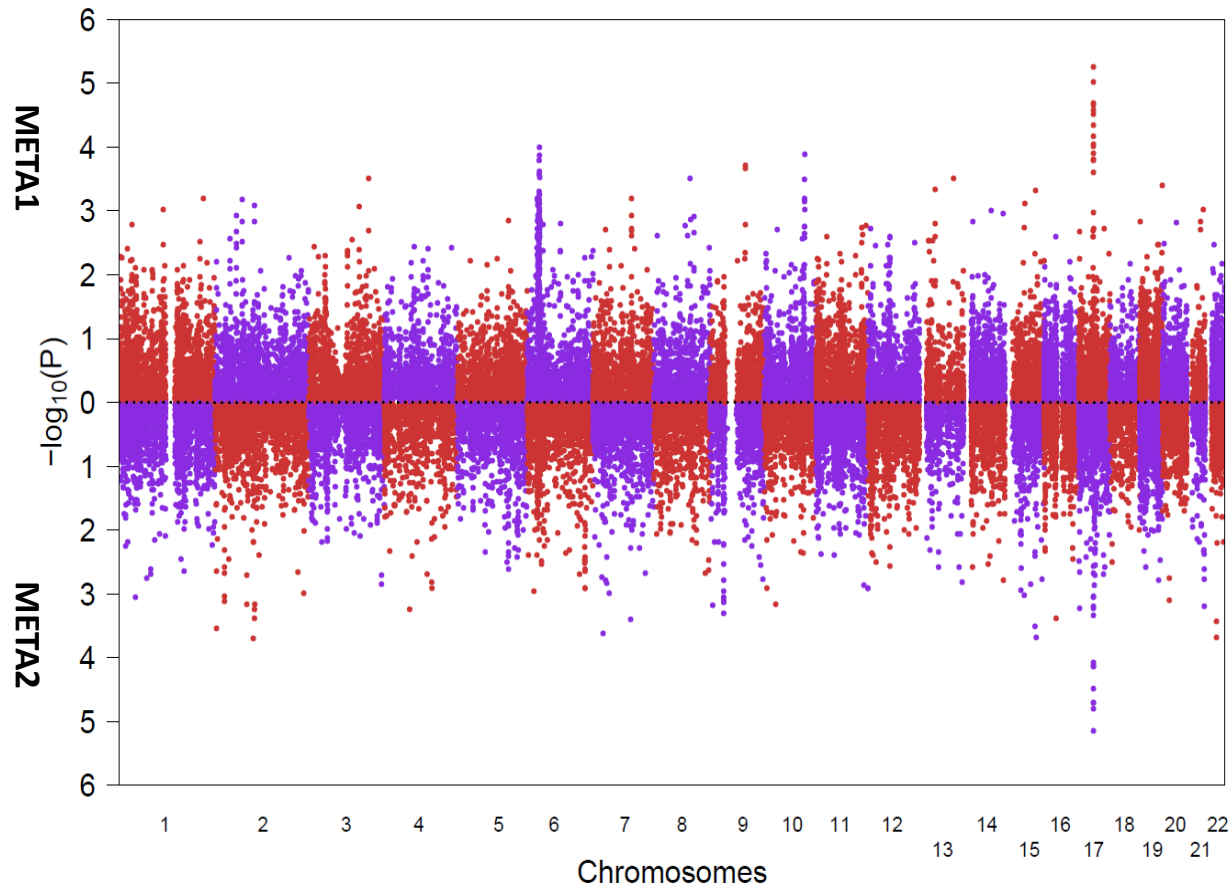

**Supplementary Figure S2. Distribution of pairwise module similarities before and after merging the raw modules generated by the Dense Module Search algorithm.** The pairwise module similarities (indicating overlaps between modules) were remarkably reduced in both META1 (left panel) and META2 (right panel) after hierarchically merging similar raw modules

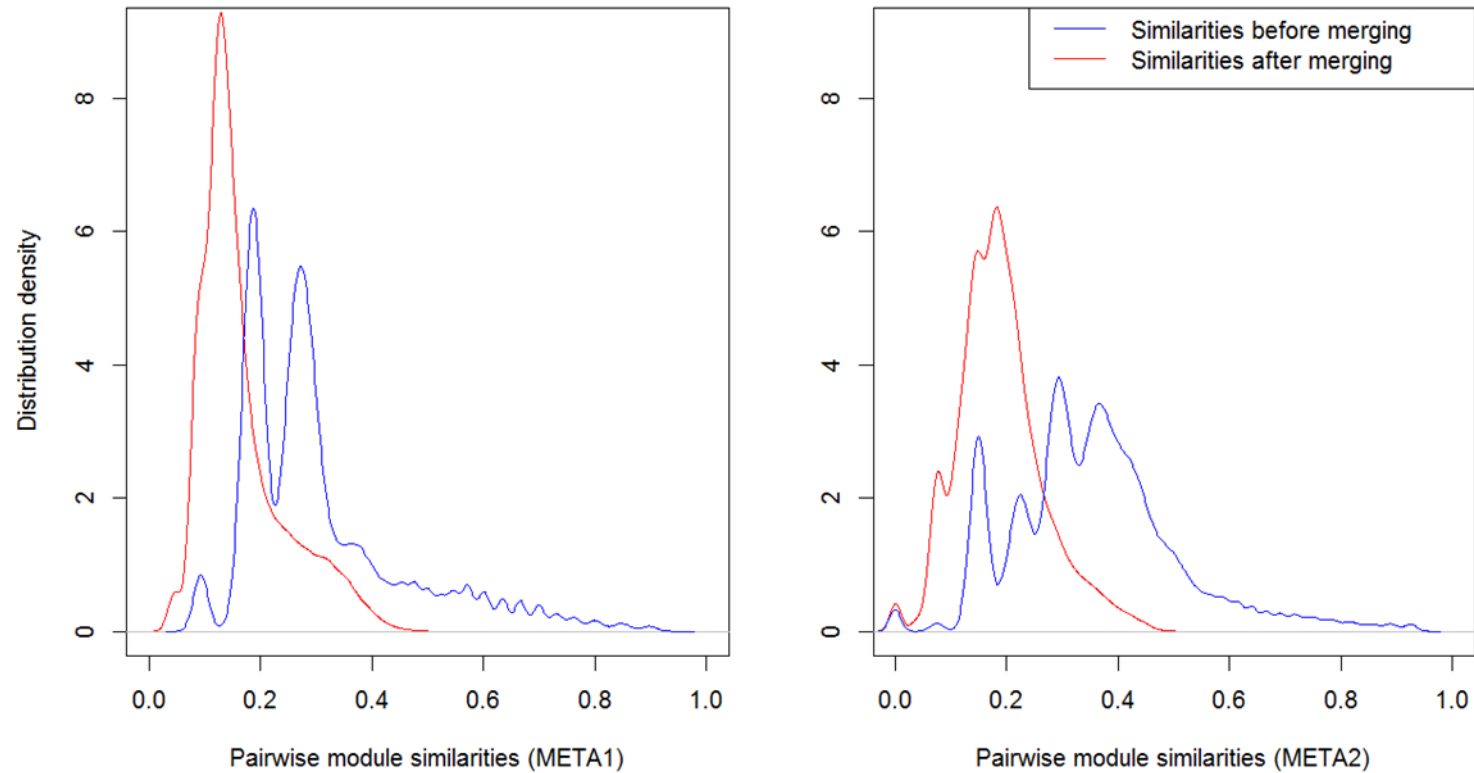

**Supplementary Figure S3. Distribution of pairwise module similarities between modules in META1 and modules in META2.** A total of 1,072,904 module pairs were constructed. The bins represent histograms of pairwise module similarities. The ticks represent rug plot of the similarities. Each tick represents one pairwise module similarity. The red ticks highlight the 10 highest pairwise module similarities

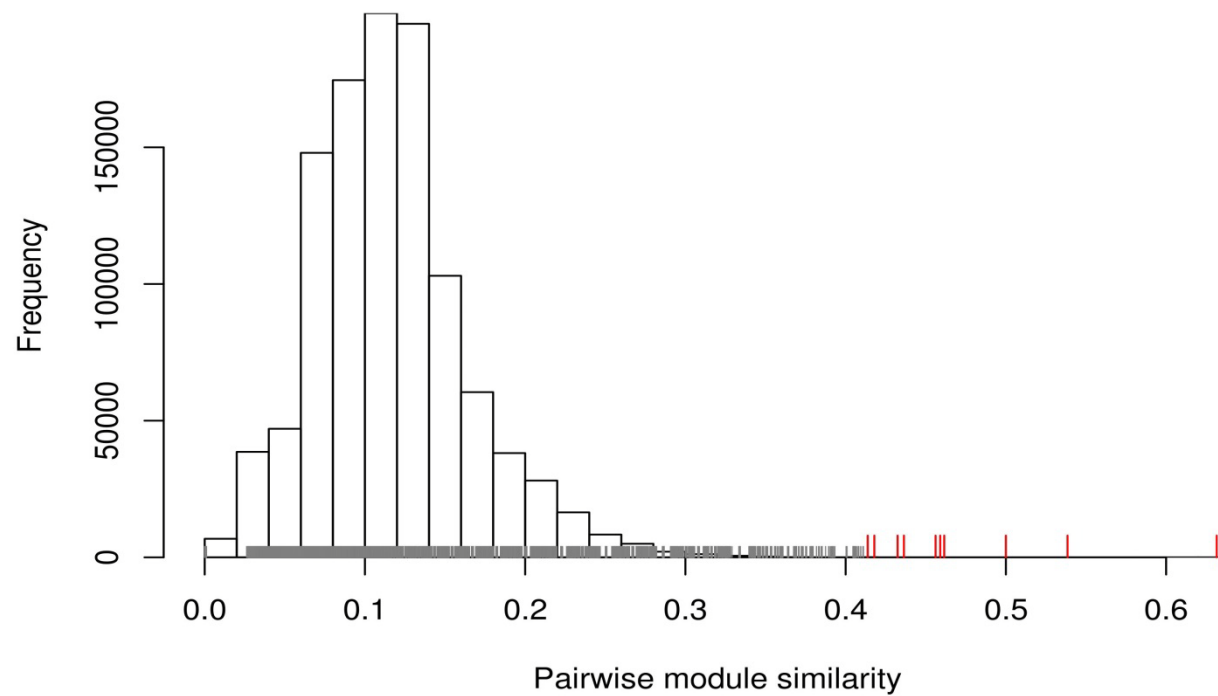

**Supplementary Figure S4. Consistent gene modules between META1 and META2.** We selected top 10 module pairs showing highest pairwise module similarities among all module pairs between META1 and META2. The involved modules were merged within each dataset, resulting in a subnetwork of 171 genes in META1 (a) and a subnetwork of 201 genes in META2 (b). The intersection of the two subnetworks was retrieved to construct the final module, resulting in a module of 91 genes (nodes in red). The node sizes in this plot are proportional to the gene z-scores

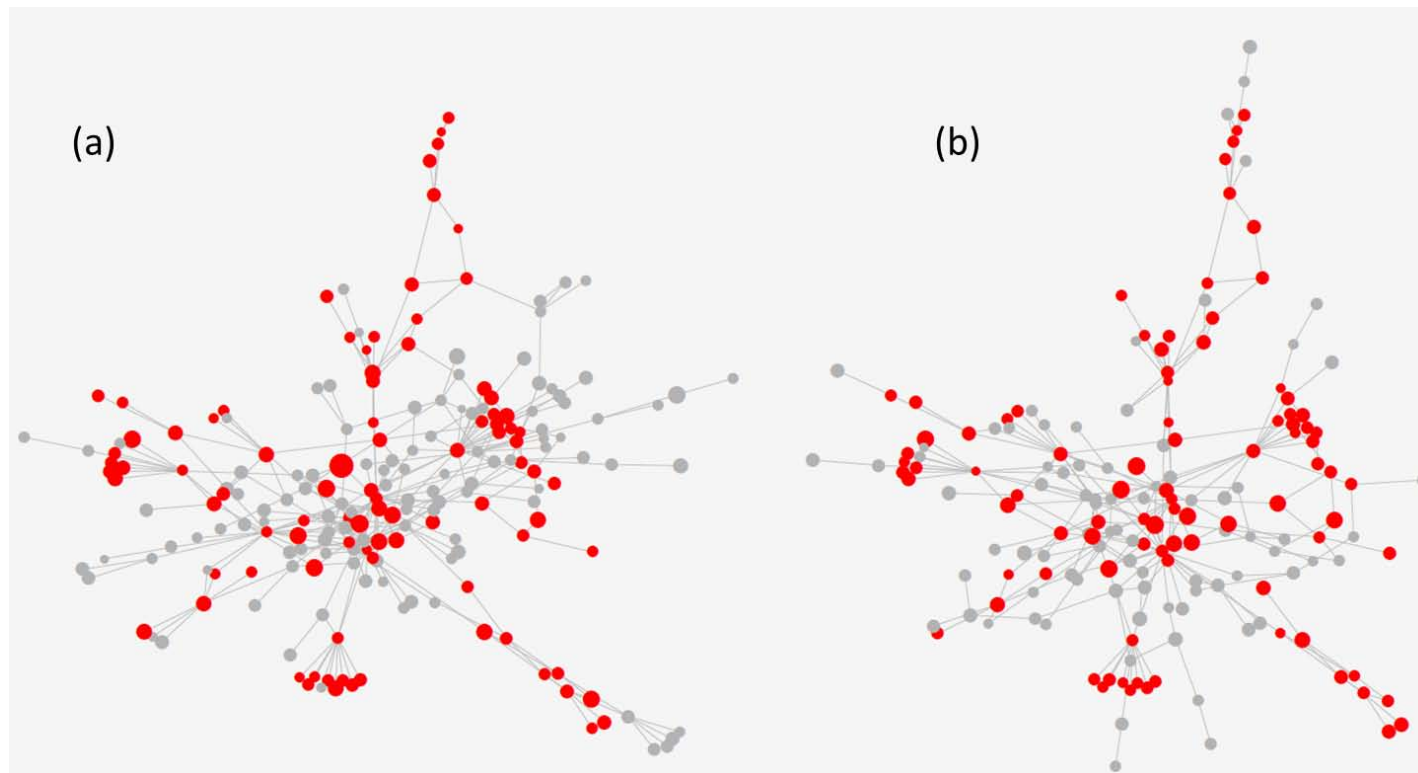

**Supplementary Figure S5. An illustrative example of fastCGP.** An artificial GWAS result consisting of  $L=100$  SNP  $P$ -values were created. All  $P$ -values were set as 0.1 except  $P_{11} = 0.05, P_{12} = 0.02, P_{14} = 0.04,$  and  $P_{18} = 0.07$ . These  $P$ -values are ordered on a circle according to the chromosomal position of corresponding SNPs. A gene  $g$  has three SNPs mapped to its genomic region. Its uncorrected  $P$ -value  $P_g$  is set as the minimum SNP  $P$ -value among the three mapped SNPs ( $P_g = P_{18} = 0.07$ ). There are four extreme SNP  $P$ -values on the circle  $P_{11}, P_{12}, P_{14}$  and  $P_{18} (\leq P_g)$ . The consecutive extreme  $P$ -value pairs are  $P_{11} \sim P_{12}, P_{12} \sim P_{14}, P_{14} \sim P_{18}, P_{18} \sim P_{11}$

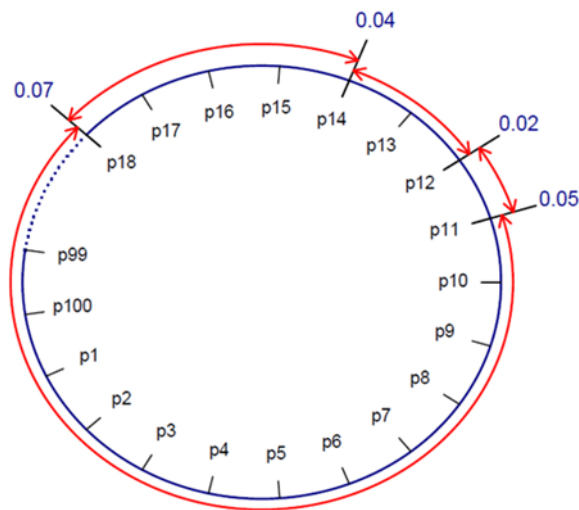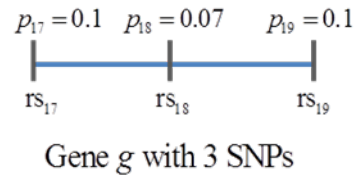

**Supplementary Figure S6. Comparison of gene-level  $P$ -values obtained by fastCGP and VEGAS2<sup>2</sup>.** Gene-level  $P$ -values were computed from asthma META2 dataset using fastCGP and VEGAS2 (*-bestsnp* sub-model). Their results ( $-\log_{10}(P\text{-value})$ ) were compared for each chromosome from chromosome 1 (Chr1) to chromosome 22 (Chr22). The red diagonal lines indicate perfect match (identical) of the two results.  $\rho$  represents the Pearson correlation coefficient between the two results

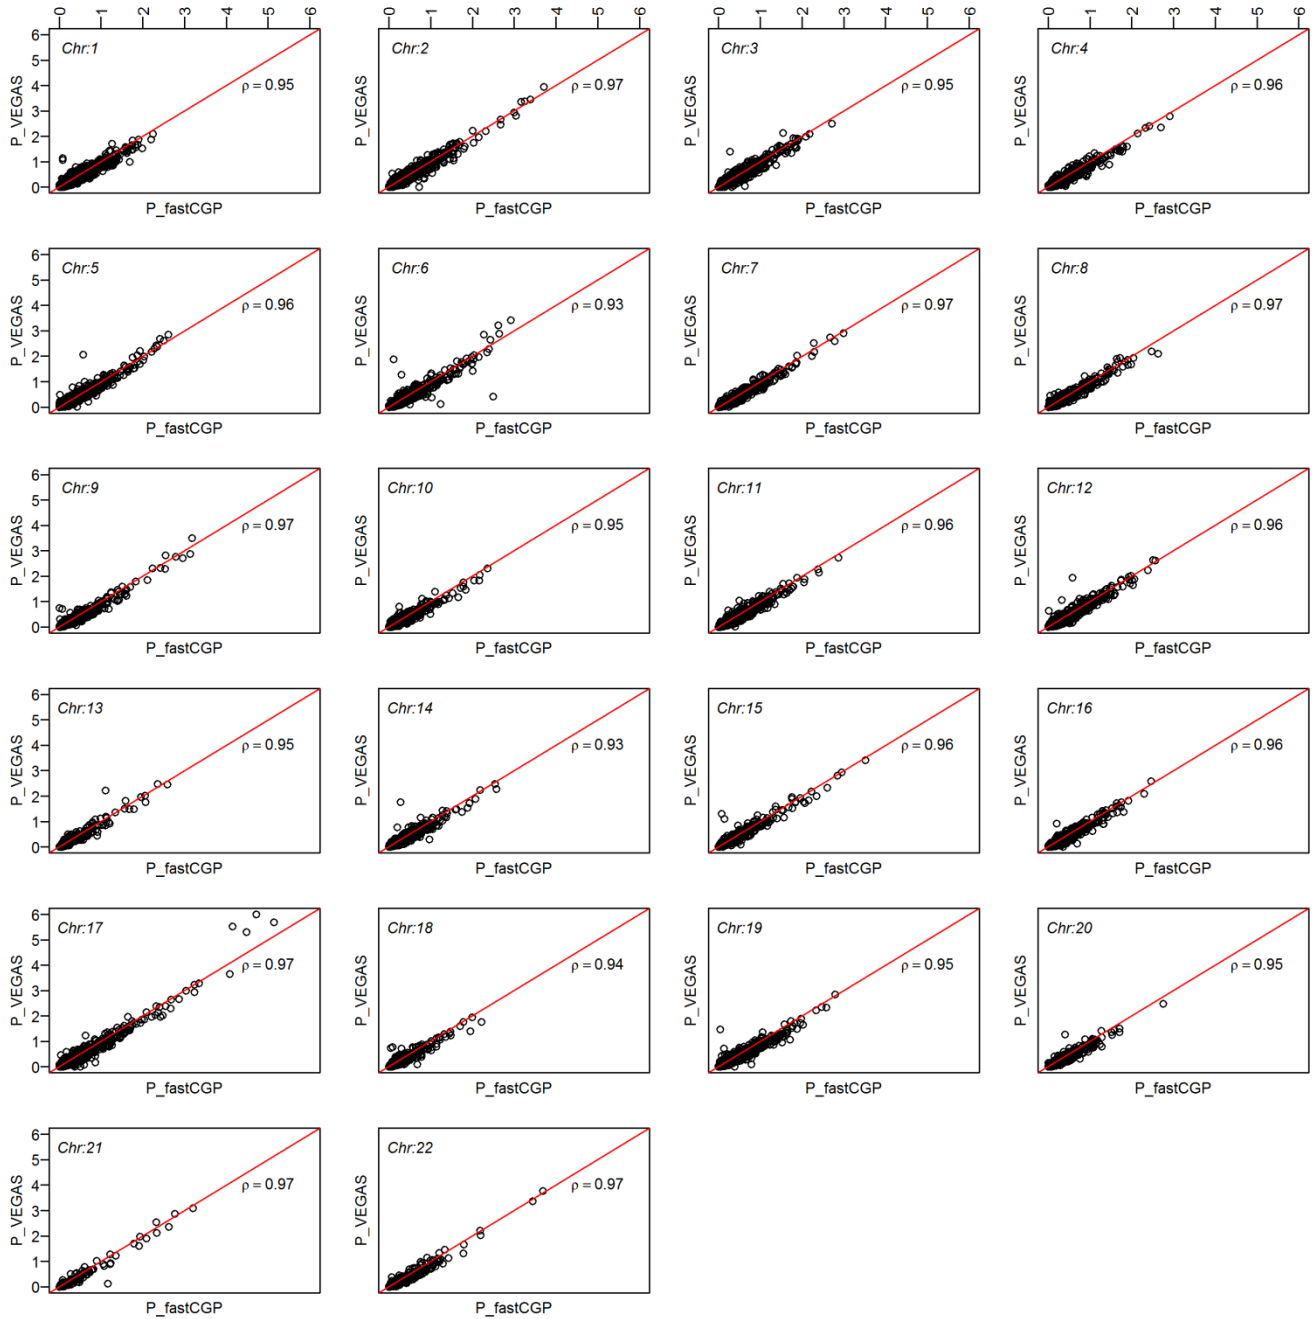



**Supplementary Figure S7. Comparison of gene-level  $P$ -values obtained by fastCGP and MAGMA<sup>3</sup>.** Gene-level  $P$ -values were computed from asthma META2 dataset using fastCGP and MAGMA (*-snp-wise=top,1* sub-model). Their results ( $-\log_{10}(P\text{-value})$ ) were compared for each chromosome from chromosome 1 (Chr1) to chromosome 22 (Chr22). The red diagonal lines indicate perfect match (identical) of the two results.  $\rho$  represents the Pearson correlation coefficient between the two results

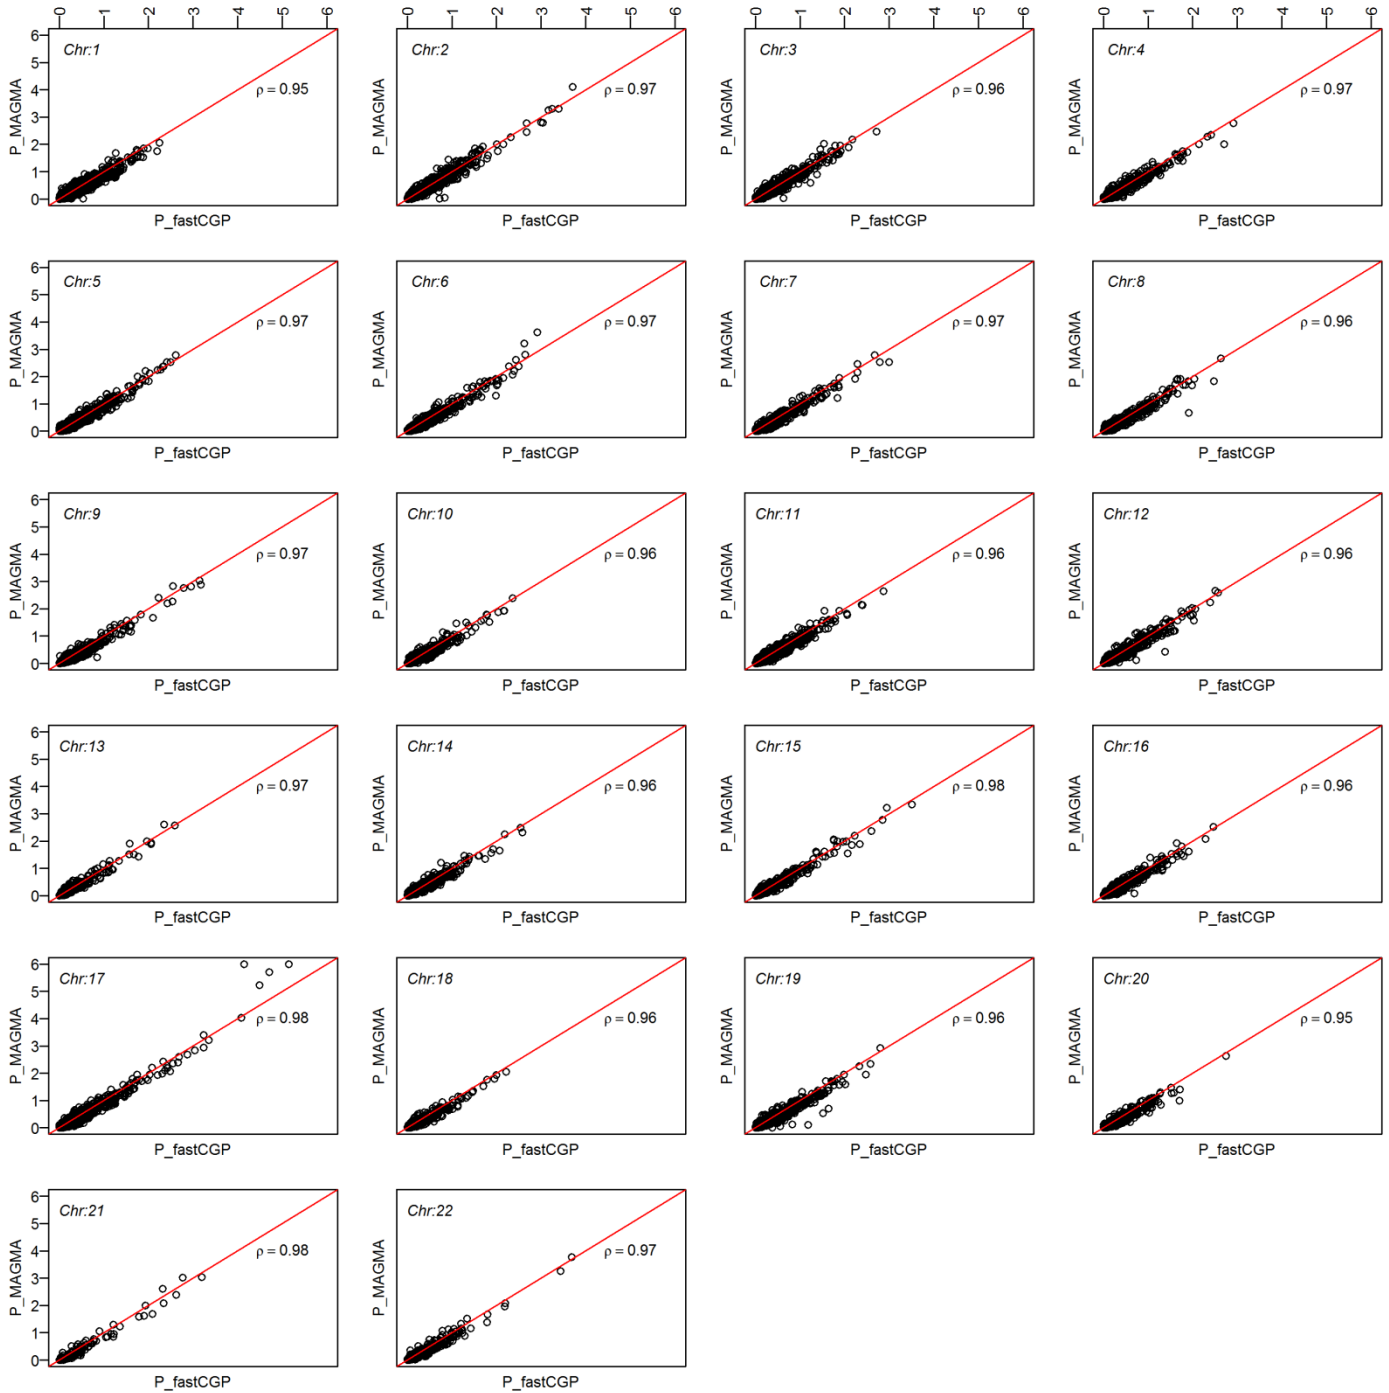

**Supplementary Table S1. Gene-level *P*-values in META1 and META2 datasets for the 91 genes in the final childhood-onset asthma module**

| Chr                                                         | Gene            | Start       | End         | # SNPs | META1      |                          |                                                 | META2      |                          |                                                 |
|-------------------------------------------------------------|-----------------|-------------|-------------|--------|------------|--------------------------|-------------------------------------------------|------------|--------------------------|-------------------------------------------------|
|                                                             |                 |             |             |        | Best SNP   | Best SNP <i>P</i> -value | Corrected Best SNP <i>P</i> -value (by fastCGP) | Best SNP   | Best SNP <i>P</i> -value | Corrected Best SNP <i>P</i> -value (by fastCGP) |
| <b>Genes nominally significant in both META1 and META2</b>  |                 |             |             |        |            |                          |                                                 |            |                          |                                                 |
| 2                                                           | <i>IL1RL1</i>   | 102 927 962 | 102 968 497 | 80     | rs4988957  | 2.9E-05                  | 1.5E-03                                         | rs10192157 | 2.2E-05                  | 5.6E-04                                         |
| 2                                                           | <i>IL18R1</i>   | 102 979 097 | 103 015 218 | 48     | rs3771166  | 1.9E-05                  | 8.2E-04                                         | rs1974675  | 2.4E-05                  | 4.1E-04                                         |
| 2                                                           | <i>IL18RAP</i>  | 103 035 254 | 103 069 025 | 71     | rs6543135  | 2.6E-03                  | 4.5E-02                                         | rs2310300  | 2.6E-05                  | 6.9E-04                                         |
| 4                                                           | <i>CRMP1</i>    | 5 822 491   | 5 894 785   | 60     | rs13144677 | 2.7E-03                  | 4.1E-02                                         | rs10011385 | 1.3E-03                  | 1.7E-02                                         |
| 5                                                           | <i>RAD50</i>    | 131 892 630 | 131 979 599 | 35     | rs2240032  | 1.2E-03                  | 1.5E-02                                         | rs2897443  | 3.8E-04                  | 3.9E-03                                         |
| 6                                                           | <i>ZNF192</i>   | 28 109 716  | 28 125 236  | 21     | rs13205911 | 6.4E-05                  | 1.2E-03                                         | rs2622321  | 7.4E-03                  | 4.1E-02                                         |
| 6                                                           | <i>RAET1E</i>   | 150 209 601 | 150 212 097 | 10     | rs9371533  | 1.1E-02                  | 4.5E-02                                         | rs9371533  | 1.0E-02                  | 3.6E-02                                         |
| 9                                                           | <i>IL33</i>     | 6 241 678   | 6 257 982   | 20     | rs7019575  | 4.8E-03                  | 3.2E-02                                         | rs7019575  | 8.7E-05                  | 6.7E-04                                         |
| 9                                                           | <i>CTSL1</i>    | 90 340 974  | 90 346 384  | 4      | rs2378757  | 1.8E-03                  | 5.6E-03                                         | rs2378757  | 6.9E-03                  | 1.4E-02                                         |
| 12                                                          | <i>C12orf43</i> | 121 440 848 | 121 454 300 | 10     | rs3751150  | 4.4E-04                  | 3.1E-03                                         | rs3751151  | 1.2E-02                  | 4.3E-02                                         |
| 17                                                          | <i>PNMT</i>     | 37 824 507  | 37 826 728  | 1      | rs876493   | 1.3E-07                  | 3.1E-05                                         | rs876493   | 4.0E-05                  | 7.3E-05                                         |
| 17                                                          | <i>ERBB2</i>    | 37 844 393  | 37 884 915  | 7      | rs1058808  | 3.5E-06                  | 1.6E-04                                         | rs1058808  | 1.6E-05                  | 8.2E-05                                         |
| 17                                                          | <i>IKZF3</i>    | 37 921 198  | 38 020 441  | 48     | rs907091   | 2.5E-15                  | 4.6E-05                                         | rs9909593  | 1.6E-07                  | 7.1E-05                                         |
| 17                                                          | <i>GSDMB</i>    | 38 060 848  | 38 074 903  | 12     | rs9303281  | 2.6E-16                  | 5.5E-06                                         | rs2305480  | 7.5E-08                  | 1.9E-05                                         |
| 17                                                          | <i>ORMDL3</i>   | 38 077 296  | 38 083 854  | 4      | rs12603332 | 4.6E-15                  | 9.7E-06                                         | rs8076131  | 7.3E-08                  | 7.2E-06                                         |
| 17                                                          | <i>GSDMA</i>    | 38 119 226  | 38 134 019  | 6      | rs7212938  | 2.4E-13                  | 2.7E-05                                         | rs3902025  | 3.2E-07                  | 3.3E-05                                         |
| 17                                                          | <i>PSMD3</i>    | 38 137 060  | 38 154 212  | 21     | rs11655264 | 1.0E-07                  | 9.6E-05                                         | rs12453334 | 6.9E-05                  | 5.8E-04                                         |
| 17                                                          | <i>MED24</i>    | 38 175 350  | 38 210 889  | 21     | rs12309    | 3.0E-06                  | 2.5E-04                                         | rs12451897 | 1.2E-04                  | 9.2E-04                                         |
| 19                                                          | <i>JAK3</i>     | 17 935 591  | 17 958 841  | 12     | rs2110586  | 5.8E-03                  | 2.8E-02                                         | rs3212701  | 1.2E-02                  | 4.5E-02                                         |
| <b>Genes nominally significant in either META1 or META2</b> |                 |             |             |        |            |                          |                                                 |            |                          |                                                 |
| 2                                                           | <i>MARCH4</i>   | 217 122 585 | 217 236 750 | 113    | rs1477235  | 3.0E-02                  | 4.0E-01                                         | rs1510836  | 1.3E-03                  | 2.8E-02                                         |
| 3                                                           | <i>CCRL1</i>    | 132 316 094 | 132 321 382 | 2      | rs7626622  | 3.0E-04                  | 8.5E-04                                         | rs7626622  | 1.7E-01                  | 2.2E-01                                         |
| 6                                                           | <i>BTN3A3</i>   | 26 440 763  | 26 453 643  | 15     | rs13220495 | 1.8E-04                  | 1.9E-03                                         | rs3846845  | 1.3E-01                  | 4.3E-01                                         |
| 6                                                           | <i>ZNF165</i>   | 28 046 572  | 28 057 341  | 9      | rs1321505  | 3.7E-03                  | 1.6E-02                                         | rs203878   | 2.8E-02                  | 8.8E-02                                         |
| 6                                                           | <i>MICA</i>     | 31 371 371  | 31 383 090  | 41     | rs2844518  | 3.1E-08                  | 1.0E-04                                         | rs12213831 | 6.4E-02                  | 4.0E-01                                         |
| 6                                                           | <i>MICB</i>     | 31 465 855  | 31 478 901  | 26     | rs3130614  | 2.9E-05                  | 7.6E-04                                         | rs2855814  | 3.5E-01                  | 9.0E-01                                         |
| 6                                                           | <i>BAI3</i>     | 69 345 632  | 70 099 403  | 770    | rs3757043  | 4.6E-05                  | 1.3E-02                                         | rs17502590 | 3.7E-02                  | 9.5E-01                                         |
| 6                                                           | <i>ULBP1</i>    | 150 285 143 | 150 294 846 | 6      | rs9478311  | 1.2E-01                  | 2.8E-01                                         | rs9478311  | 1.2E-03                  | 3.2E-03                                         |
| 9                                                           | <i>CCL19</i>    | 34 689 567  | 34 691 274  | 2      | rs3176813  | 4.1E-02                  | 5.5E-02                                         | rs3136658  | 2.6E-02                  | 3.3E-02                                         |
| 9                                                           | <i>SHC3</i>     | 91 628 046  | 91 793 682  | 134    | rs1331180  | 2.0E-05                  | 1.6E-03                                         | rs2316280  | 3.6E-02                  | 4.9E-01                                         |

|                    |                 |             |             |      |            |         |         |            |         |         |
|--------------------|-----------------|-------------|-------------|------|------------|---------|---------|------------|---------|---------|
| 10                 | <i>CNNM2</i>    | 104 678 114 | 104 838 241 | 129  | rs943036   | 2.3E-05 | 1.8E-03 | rs2296569  | 6.5E-02 | 6.7E-01 |
| 12                 | <i>STAT6</i>    | 57 489 191  | 57 505 161  | 10   | rs324015   | 8.7E-04 | 5.3E-03 | rs1059513  | 2.0E-02 | 6.8E-02 |
| 17                 | <i>CCL8</i>     | 32 646 066  | 32 648 421  | 2    | rs3138036  | 9.2E-01 | 9.7E-01 | rs3138036  | 2.2E-02 | 2.8E-02 |
| 18                 | <i>ZNF24</i>    | 32 912 178  | 32 924 426  | 12   | rs7239712  | 4.2E-03 | 2.2E-02 | rs1064753  | 1.9E-02 | 7.2E-02 |
| 19                 | <i>JSRP1</i>    | 2 252 252   | 2 255 344   | 3    | rs7250822  | 1.1E-02 | 2.2E-02 | rs7250822  | 2.0E-01 | 3.2E-01 |
| 19                 | <i>FCER2</i>    | 7 753 643   | 7 767 032   | 22   | rs2287866  | 1.4E-03 | 1.3E-02 | rs2303112  | 1.4E-02 | 7.8E-02 |
| <b>Other genes</b> |                 |             |             |      |            |         |         |            |         |         |
| 1                  | <i>FBXO6</i>    | 11 724 150  | 11 734 411  | 2    | rs747863   | 6.1E-01 | 7.5E-01 | rs747863   | 6.1E-02 | 7.9E-02 |
| 1                  | <i>CD48</i>     | 160 648 536 | 160 681 585 | 14   | rs3796502  | 1.6E-02 | 7.2E-02 | rs10489636 | 8.2E-02 | 2.9E-01 |
| 1                  | <i>CD247</i>    | 167 399 877 | 167 487 847 | 116  | rs864537   | 2.7E-03 | 6.7E-02 | rs864537   | 3.0E-03 | 6.0E-02 |
| 1                  | <i>CR2</i>      | 207 627 670 | 207 663 240 | 41   | rs17258982 | 4.6E-02 | 3.2E-01 | rs7543913  | 9.1E-02 | 5.1E-01 |
| 2                  | <i>CEBPZ</i>    | 37 428 772  | 37 458 740  | 12   | rs2239650  | 3.4E-02 | 1.3E-01 | rs11689186 | 1.0E-01 | 3.3E-01 |
| 2                  | <i>IL1RL2</i>   | 102 803 433 | 102 855 811 | 134  | rs17026782 | 6.6E-02 | 6.9E-01 | rs12987222 | 1.4E-02 | 2.4E-01 |
| 2                  | <i>DNER</i>     | 230 222 345 | 230 579 286 | 353  | rs10192168 | 1.6E-03 | 1.1E-01 | rs6726280  | 3.2E-03 | 1.6E-01 |
| 3                  | <i>CCR8</i>     | 39 371 197  | 39 375 171  | 2    | rs2853699  | 5.4E-02 | 7.2E-02 | rs4676633  | 2.3E-01 | 3.0E-01 |
| 3                  | <i>CCBP2</i>    | 42 850 964  | 42 908 775  | 36   | rs13093968 | 8.3E-03 | 7.4E-02 | rs4396867  | 4.4E-01 | 9.7E-01 |
| 3                  | <i>CCR9</i>     | 45 928 019  | 45 944 667  | 12   | rs17714101 | 4.5E-02 | 1.6E-01 | rs6441931  | 2.6E-01 | 6.7E-01 |
| 3                  | <i>RYK</i>      | 133 875 978 | 133 969 586 | 52   | rs4280635  | 8.4E-02 | 5.4E-01 | rs10935104 | 7.5E-02 | 4.9E-01 |
| 3                  | <i>SEC62</i>    | 169 684 580 | 169 716 161 | 23   | rs9813592  | 1.8E-02 | 1.1E-01 | rs16854694 | 3.2E-01 | 8.5E-01 |
| 4                  | <i>LNXI</i>     | 54 326 437  | 54 457 724  | 156  | rs2117600  | 2.6E-02 | 4.4E-01 | rs9312642  | 1.5E-02 | 2.9E-01 |
| 4                  | <i>LPHN3</i>    | 62 362 839  | 62 938 168  | 336  | rs17082520 | 1.3E-02 | 4.6E-01 | rs1497906  | 8.9E-03 | 3.4E-01 |
| 4                  | <i>CXCL13</i>   | 78 432 907  | 78 532 988  | 27   | rs17406477 | 2.1E-01 | 7.3E-01 | rs355687   | 2.8E-02 | 1.6E-01 |
| 5                  | <i>PCDHGA11</i> | 140 800 537 | 140 892 546 | 57   | rs11958830 | 4.5E-02 | 3.7E-01 | rs1423149  | 1.8E-01 | 8.1E-01 |
| 6                  | <i>RAET1G</i>   | 150 238 014 | 150 244 214 | 4    | rs6927913  | 2.3E-01 | 4.2E-01 | rs9397070  | 5.0E-02 | 9.7E-02 |
| 6                  | <i>ULBP3</i>    | 150 385 743 | 150 390 202 | 7    | rs12202737 | 3.0E-01 | 6.3E-01 | rs2010212  | 2.7E-02 | 7.3E-02 |
| 6                  | <i>PARK2</i>    | 161 768 590 | 163 148 834 | 1776 | rs4623220  | 1.6E-03 | 3.9E-01 | rs11966738 | 1.9E-03 | 4.0E-01 |
| 7                  | <i>TPST1</i>    | 65 670 259  | 65 825 438  | 68   | rs778732   | 3.8E-01 | 9.8E-01 | rs4149463  | 1.9E-01 | 8.6E-01 |
| 8                  | <i>TERF1</i>    | 73 921 097  | 73 959 987  | 26   | rs12334686 | 2.4E-01 | 7.7E-01 | rs10107605 | 5.8E-01 | 9.9E-01 |
| 9                  | <i>CCL27</i>    | 34 661 893  | 34 662 689  | 1    | rs11575584 | 6.3E-01 | 6.1E-01 | rs11575584 | 3.4E-01 | 3.1E-01 |
| 9                  | <i>SPTLC1</i>   | 94 793 427  | 94 877 690  | 74   | rs16908106 | 9.5E-02 | 6.6E-01 | rs12235495 | 4.1E-03 | 5.8E-02 |
| 10                 | <i>PCDH21</i>   | 85 954 517  | 85 977 122  | 34   | rs12781048 | 2.1E-01 | 7.6E-01 | rs12781048 | 4.1E-02 | 2.5E-01 |
| 11                 | <i>DCHS1</i>    | 6 642 558   | 6 677 080   | 28   | rs11607376 | 7.1E-02 | 3.6E-01 | rs997263   | 2.0E-01 | 7.1E-01 |
| 11                 | <i>NCR3LGI</i>  | 17 373 279  | 17 398 868  | 13   | rs6486364  | 4.9E-02 | 1.9E-01 | rs12791318 | 1.1E-01 | 3.7E-01 |
| 11                 | <i>IL18</i>     | 112 013 976 | 112 034 840 | 17   | rs1834481  | 1.0E-01 | 3.9E-01 | rs2043055  | 1.5E-01 | 5.1E-01 |
| 11                 | <i>CXCR5</i>    | 118 754 541 | 118 766 971 | 14   | rs12363277 | 1.0E-01 | 3.6E-01 | rs12363277 | 5.1E-02 | 1.9E-01 |
| 12                 | <i>KLRK1</i>    | 10 524 952  | 10 542 640  | 20   | rs2617149  | 1.5E-02 | 8.2E-02 | rs12826560 | 9.0E-02 | 3.7E-01 |

|    |                 |             |             |     |            |         |         |            |         |         |
|----|-----------------|-------------|-------------|-----|------------|---------|---------|------------|---------|---------|
| 12 | <i>KLRC4</i>    | 10 559 983  | 10 562 356  | 5   | rs2734565  | 1.4E-01 | 2.9E-01 | rs2617170  | 4.2E-01 | 7.2E-01 |
| 12 | <i>KIF21A</i>   | 39 687 030  | 39 836 918  | 71  | rs11171691 | 2.4E-02 | 2.6E-01 | rs11172108 | 4.9E-02 | 4.3E-01 |
| 12 | <i>BIN2</i>     | 51 674 822  | 51 717 938  | 20  | rs4761998  | 6.4E-02 | 2.9E-01 | rs4761995  | 5.9E-02 | 2.6E-01 |
| 12 | <i>IFNG</i>     | 68 548 550  | 68 553 521  | 4   | rs1861494  | 6.6E-01 | 8.9E-01 | rs1861493  | 3.4E-01 | 5.8E-01 |
| 12 | <i>CMKLR1</i>   | 108 681 821 | 108 733 094 | 48  | rs11113818 | 8.2E-02 | 5.1E-01 | rs10861889 | 5.1E-02 | 3.6E-01 |
| 13 | <i>FREM2</i>    | 39 261 173  | 39 461 268  | 220 | rs11618650 | 4.1E-03 | 1.5E-01 | rs2218722  | 1.3E-02 | 3.3E-01 |
| 13 | <i>PCDH20</i>   | 61 983 818  | 61 989 655  | 6   | rs3829388  | 1.8E-01 | 3.9E-01 | rs3812872  | 3.0E-01 | 6.1E-01 |
| 15 | <i>CD276</i>    | 73 976 622  | 74 006 859  | 35  | rs12591553 | 3.1E-01 | 8.9E-01 | rs12594595 | 9.0E-02 | 4.7E-01 |
| 16 | <i>ZNF434</i>   | 3 432 085   | 3 451 025   | 14  | rs28603    | 8.1E-02 | 2.9E-01 | rs17136367 | 2.3E-01 | 6.4E-01 |
| 16 | <i>ZNF174</i>   | 3 451 190   | 3 459 364   | 5   | rs39728    | 3.7E-01 | 6.6E-01 | rs37811    | 2.1E-01 | 4.3E-01 |
| 16 | <i>ITGAX</i>    | 31 366 509  | 31 394 318  | 16  | rs2929     | 1.9E-01 | 6.0E-01 | rs8052139  | 4.7E-02 | 1.9E-01 |
| 17 | <i>CCL13</i>    | 32 683 471  | 32 685 629  | 2   | rs159313   | 7.2E-01 | 8.5E-01 | rs2072069  | 8.5E-01 | 9.4E-01 |
| 17 | <i>CCL1</i>     | 32 687 399  | 32 690 252  | 5   | rs3136682  | 4.4E-02 | 1.0E-01 | rs3136682  | 2.3E-01 | 4.5E-01 |
| 17 | <i>CCL16</i>    | 34 303 535  | 34 308 523  | 4   | rs2063979  | 8.2E-01 | 9.7E-01 | rs11080369 | 3.4E-02 | 6.6E-02 |
| 17 | <i>CCL4</i>     | 34 431 220  | 34 433 014  | 2   | rs1719147  | 4.4E-02 | 6.0E-02 | rs1634517  | 5.0E-01 | 6.3E-01 |
| 17 | <i>ZNHIT3</i>   | 34 842 473  | 34 851 662  | 4   | rs2306589  | 8.1E-02 | 1.6E-01 | rs2277662  | 2.4E-01 | 4.3E-01 |
| 18 | <i>SERPINB3</i> | 61 322 431  | 61 329 197  | 3   | rs1065205  | 4.5E-01 | 6.7E-01 | rs7228687  | 2.0E-01 | 3.3E-01 |
| 19 | <i>ELAVL1</i>   | 8 023 457   | 8 070 529   | 24  | rs7251814  | 3.9E-01 | 9.1E-01 | rs12977189 | 8.3E-02 | 3.8E-01 |
| 19 | <i>CCL25</i>    | 8 117 934   | 8 127 547   | 8   | rs2287936  | 3.9E-01 | 7.7E-01 | rs2032887  | 3.5E-01 | 7.2E-01 |
| 19 | <i>C19orf66</i> | 10 196 806  | 10 203 928  | 2   | rs2232066  | 3.9E-02 | 5.3E-02 | rs2232066  | 9.5E-02 | 1.2E-01 |
| 19 | <i>CDKN2D</i>   | 10 677 138  | 10 679 655  | 1   | rs1465701  | 6.3E-01 | 6.1E-01 | rs1465701  | 2.7E-01 | 2.4E-01 |
| 19 | <i>ZNF20</i>    | 12 242 803  | 12 251 140  | 2   | rs155955   | 2.1E-01 | 2.8E-01 | rs12608894 | 1.9E-01 | 2.5E-01 |
| 19 | <i>RCN3</i>     | 50 030 875  | 50 046 890  | 5   | rs10419198 | 3.3E-01 | 6.1E-01 | rs8108243  | 1.9E-01 | 3.9E-01 |
| 20 | <i>SIRPD</i>    | 1 514 897   | 1 538 343   | 26  | rs16995146 | 5.1E-02 | 2.7E-01 | rs2249673  | 2.3E-01 | 7.5E-01 |
| 21 | <i>APP</i>      | 27 252 861  | 27 543 446  | 306 | rs7281055  | 8.2E-03 | 3.2E-01 | rs2830076  | 3.1E-02 | 6.8E-01 |
| 21 | <i>COL18A1</i>  | 46 825 097  | 46 933 634  | 82  | rs2236483  | 1.3E-01 | 7.8E-01 | rs17004785 | 2.0E-01 | 9.1E-01 |
| 22 | <i>TPST2</i>    | 26 921 714  | 26 986 089  | 94  | rs5752349  | 3.4E-02 | 4.0E-01 | rs4149484  | 4.7E-02 | 4.8E-01 |

Start and end positions of each gene are in accordance with Build 37.1.

The genes at known asthma loci are in bold.

**Supplementary Methods 1: computing gene-level  $P$ -values via fastCGP.** We take advantage of the Circular Genomic Permutation (CGP) strategy<sup>4</sup> and propose an efficient and exact method, named fastCGP, to compute gene-level  $P$ -values from SNP-level  $P$ -values of a GWAS. CGP is a randomization method that permutes SNP-level statistics in a genomic manner to preserve the genomic structure such as regional linkage disequilibrium (LD), thereby to keep similar patterns of correlation in the permuted data as in the original data. Briefly, it considers the genome to be circular and ordered from chromosome 1 to chromosome 22. SNP-level  $P$ -values of a GWAS are ordered according to the position of the SNPs on the circle. A CGP sample is generated by rotating the ordered statistics for a random position and reassigning them to each SNP. This randomization strategy has been successfully applied to several studies<sup>5-7</sup>, and was shown to have similar performances compared to the gold standard of phenotype permutation in the context of pathway analysis<sup>8</sup>.

Our method starts by mapping SNPs to genes (between the start site and 3'-untranslated region of each gene) using dbSNP Build 132 and human Genome Build 37.1 (a user can choose another mapping strategy). The gene-level  $P$ -value of a gene  $g$ , denoted as  $P_g$ , is represented by the best SNP  $P$ -value among all SNPs mapped to the gene. This  $P$ -value is biased by gene length (amount of mapped SNPs) as genes with more SNPs mapped tend to have a lower best SNP  $P$ -value by chance. We correct for such bias using a permutation test framework. We define the corrected  $P$ -value as  $P_{\text{corrected}} = 1 - l / (L + 1)$ , where  $L$  is the total number of CGP samples;  $l$  is the number of samples with  $P_{\pi, g} > P_g$ , which we call as *normal CGP samples* (nCGP). Particularly, we include all non-repeating CGP samples so that to obtain the best obtainable  $P$ -value within this permutation test framework. In this case,  $L$  becomes the total amount of SNPs placed on the circle (hence is the number of SNPs in a GWAS), while  $l$  can be calculated analytically without generating any CGP sample. For illustration convenience, we call a SNP  $P$ -value as an extreme  $P$ -value if it is less than or equal to  $P_g$ . We say two extreme  $P$ -values are consecutive if there is no other extreme  $P$ -value placed between them on the circle. Note that the SNPs mapped to a gene are consecutive on the circle, hence by rotating the SNP  $P$ -values, it generates a nCGP only if all  $P$ -values reassigned to gene  $g$  are located between some pair of consecutive extreme  $P$ -values, say,  $P_i \sim P_j$  ( $1 \leq i, j \leq L$  are the SNP positions on the circle). Denote  $d_{ij}$  as the number of positions between  $P_i$  and  $P_j$  on the circle,  $m$  as the number of SNPs assigned to the gene,  $I_{(\cdot)}$  as the indicator function. Then the number of unique rotations with all reassigned  $P$ -values located within  $P_i \sim P_j$  is equal to  $\gamma_{ij} = (d_{ij} - m + 1)I_{(d_{ij} \geq m)}$ . Since the total amount of non-repeating nCGPs is the summation of  $\gamma_{ij}$  for all pairs of consecutive extreme  $P$ -

values, this leads to the formula  $P_{\text{corrected}} = 1 - \sum_{i \sim j} \gamma_{ij} / (L + 1)$ . The complete algorithm is summarized below

---

**Algorithm** Computation of corrected gene-level  $P$ -values via fastCGP

---

- Step 1.** Order GWAS SNP  $P$ -values on a circle according to the genomic positions of SNPs
  - Step 2.** Map SNPs to genes according to their genomic positions
  - Step 3.** For a gene  $g$ , set  $P_g$  as the minimum  $P$ -value of all SNPs mapped to it
  - Step 4.** Find all extreme SNP  $P$ -values on the circle:  $\{P_{SNP} \mid P_{SNP} \leq P_g\}$
  - Step 5.** Compute  $\gamma_{ij} = (d_{ij} - m + 1)I_{(d_{ij} \geq m)}$  for all pairs of consecutive extreme  $P$ -value  $P_i \sim P_j$
  - Step 6.** Compute the corrected gene-level  $P$ -value:  $P_{\text{corrected}} = 1 - \sum_{i \sim j} \gamma_{ij} / (L + 1)$
- 

In the following we present an illustrative example of fastCGP. We constructed an artificial GWAS result consisting of  $L = 100$  SNP  $P$ -values (Supplementary Fig. S5). We set all  $P$ -values as 0.1 except  $P_{11} = 0.05, P_{12} = 0.02, P_{14} = 0.04$ , and  $P_{18} = 0.07$ . These  $P$ -values are ordered on a circle according to the chromosomal position of corresponding SNPs. A gene  $g$  has  $m = 3$  SNPs mapped to its genomic region. Its uncorrected  $P$ -value  $P_g$  is set as the minimum SNP  $P$ -value among the three mapped SNPs ( $P_g = P_{18} = 0.07$ ). There are four extreme SNP  $P$ -values on the circle :  $P_{11}, P_{12}, P_{14}$  and  $P_{18}$ . The consecutive extreme  $P$ -value pairs are  $P_{11} \sim P_{12}, P_{12} \sim P_{14}, P_{14} \sim P_{18}, P_{18} \sim P_{11}$ . For each pair, the amount of unique rotations with all SNP  $P$ -values reassigned to gene  $g$  falling into this pair is 0, 0, 1 and 92 respectively. Thereby  $P_{\text{corrected}} = 1 - (0 + 0 + 1 + 92) / 101 = 0.079$ .

We compared the performance of fastCGP with two other popular methods VEGAS2<sup>2</sup> and MAGMA<sup>3</sup>. The META2 asthma dataset in our study was used for the comparison. For both VEGAS2 and MAGMA we implemented their best-SNP sub-model (use *-bestsnp* option for VEGAS2 and *snp-wise=top,1* option for MAGMA). Both methods apply Monte-Carlo simulations to correct the best-SNP  $P$ -value for the gene length bias. During simulation, the LD patterns between SNPs within a gene are estimated on the basis of the LD structure of a set of reference individuals. As we could not use the original genotypes of our asthma dataset, we used the 1,000 Genomes European population as external reference. We observed that the results obtained by fastCGP were concordant with those obtained using VEGAS2 or MAGMA. At the chromosome level, the Pearson correlation coefficients between the gene-level  $P$ -values ( $-\log_{10}$  transformed) of fastCGP and VEGAS2 range from 0.93 to 0.97, with an average value of 0.96 (Supplementary Fig. S6). The correlation coefficients of gene-level  $P$ -values between fastCGP and MAGMA range from 0.95 to 0.98, with an average value of 0.97 (Supplementary Fig. S7). As

for computational efficiency, both fastCGP and MAGMA took ~30 minutes on a PC (Intel Core i7 3.40GHz CPU, 8GB RAM); while VEGAS2 took 13 hours to perform the analysis.

### **Supplementary Methods 2: generating random modules via Metropolis-Hasting Random Walk algorithm.**

We inherited the Metropolis-Hasting Random Walk (MHRW) algorithm<sup>9</sup> to generate random modules. It has the property that the stationary probability of each node to be sampled follows the uniform distribution, and has been demonstrated to work well in practice<sup>9</sup>. In the beginning, a seed gene  $V$  is chosen from the scored-PPI. The next gene  $W$  is selected at random from all neighbours of  $V$ .  $W$  is added to the module and set as the next seed if the degree ratio of  $V$  and  $W$  is smaller than a random number drawn from uniform distribution  $U(0,1)$ . Otherwise stay at  $V$  and repeat the step. The procedure iterates until the module has the same number of genes as the module under test. To ensure sufficient coverage of the whole scored-PPI, we set each gene in the network as a seed to generate a module. Then, a total of  $N$  (equals to the number of genes in the scored-PPI) random modules are generated.

### **References**

1. Moffatt, M. F. *et al.* A large-scale, consortium-based genomewide association study of asthma. *N. Engl. J. Med.* **363**, 1211–1221 (2010).
2. Mishra, A. & Macgregor, S. VEGAS2: Software for More Flexible Gene-Based Testing. *Twin Res. Hum. Genet.* **18**, 86–91 (2015).
3. Leeuw, C. A. de, Mooij, J. M., Heskes, T. & Posthuma, D. MAGMA: Generalized Gene-Set Analysis of GWAS Data. *PLOS Comput. Biol.* **11**, e1004219 (2015).
4. Cabrera, C. P. *et al.* Uncovering networks from genome-wide association studies via circular genomic permutation. *G3 Bethesda Md* **2**, 1067–1075 (2012).
5. Stainton, J. J. *et al.* Detecting signatures of selection in nine distinct lines of broiler chickens. *Anim. Genet.* **46**, 37–49 (2015).
6. Mott, R. *et al.* The architecture of parent-of-origin effects in mice. *Cell* **156**, 332–342 (2014).

7. Chambers, E. V., Bickmore, W. A. & Semple, C. A. Divergence of mammalian higher order chromatin structure is associated with developmental loci. *PLoS Comput. Biol.* **9**, e1003017 (2013).
8. Brossard, M. *et al.* Comparison of permutations strategies to assess gene-set significance in gene-set-enrichment analysis. *22nd annual meeting of the International Genetic Epidemiology Society (IGES), 15-17 Sept. 2013, Chicago (USA). Abstract published online at [www.geneticepi.org/meeting-abstracts/](http://www.geneticepi.org/meeting-abstracts/).*
9. Gjoka, M., Kurant, M., Butts, C. T. & Markopoulou, A. Walking in Facebook: A Case Study of Unbiased Sampling of OSNs. in *2010 Proceedings IEEE INFOCOM* 1–9 (2010).  
doi:10.1109/INFOCOM.2010.5462078
